# Supplementary material
Source: MDPI journal article supplement (https://www.mdpi.com/2311-7524/10/4/410)
Supplement: s1 [file s1]

**Table S1. The effect of saline irrigation water and GABA application on chlorophyll (a and b) mg/g F.W and carotenoid content mg/g F.W of *Lavandula dentata* L. leaves during both growing seasons.**

| Treatments                         | Chlorophyll (a)<br>(mg/g F.W) |                        | Chlorophyll (b) (mg/g F.W) |                        | Carotenoid content (mg/g F.W) |                        |
|------------------------------------|-------------------------------|------------------------|----------------------------|------------------------|-------------------------------|------------------------|
|                                    | 1 <sup>st</sup><br>Seas<br>on | 2 <sup>nd</sup> Season | 1 <sup>st</sup> Season     | 2 <sup>nd</sup> Season | 1 <sup>st</sup> Season        | 2 <sup>nd</sup> Season |
| Control (fresh water)              | 2.44a                         | 1.66abc                | 0.69ab                     | 0.66ab                 | 0.69a                         | 0.71a                  |
| Sea water at 1000 ppm              | 1.66b                         | 1.53bc                 | 0.46c                      | 0.57c                  | 0.36c                         | 0.43c                  |
| Sea water at 2000 ppm              | 1.50b                         | 1.44c                  | 0.42c                      | 0.49d                  | 0.20de                        | 0.27de                 |
| Sea water at 3000 ppm              | 1.31b                         | 1.38c                  | 0.45c                      | 0.28f                  | 0.13e                         | 0.21e                  |
| 1000 ppm sea water +<br>20 mM GABA | 1.69b                         | 1.67abc                | 0.70ab                     | 0.62bc                 | 0.49b                         | 0.53b                  |
| 1000 ppm sea water+ 40<br>mM GABA  | 1.54b                         | 1.67abc                | 0.70ab                     | 0.60bc                 | 0.56b                         | 0.61b                  |
| 2000 ppm sea water+ 20<br>mM GABA  | 1.73b                         | 1.80ab                 | 0.72a                      | 0.70a                  | 0.24de                        | 0.29de                 |
| 2000 ppm sea water+ 40<br>mM GABA  | 2.64a                         | 1.97a                  | 0.57abc                    | 0.66ab                 | 0.28cd                        | 0.32d                  |
| 3000 ppm sea water+ 20<br>mM GABA  | 1.52b                         | 1.43c                  | 0.53bc                     | 0.34ef                 | 0.17de                        | 0.24e                  |
| 3000 ppm sea water+ 40<br>mM GABA  | 1.42b                         | 1.47c                  | 0.48c                      | 0.39e                  | 0.21de                        | 0.24de                 |

Means followed by the same letter at each column are not significantly different at the 5% level according to Duncan's multiple range test.

**Table S2. The effect of saline irrigation water and GABA application on relative water content, proline, essential oil percentage, and oil yield of *Lavandula dentata* L. plants.**

| Treatments                      | Proline ( $\mu\text{mol g}^{-1}$ F.W.) |                        | Relative water content % |                        | Oil percentage (%)     |                        | Oil yield (mL)         |                        |
|---------------------------------|----------------------------------------|------------------------|--------------------------|------------------------|------------------------|------------------------|------------------------|------------------------|
|                                 | 1 <sup>st</sup> Season                 | 2 <sup>nd</sup> Season | 1 <sup>st</sup> Season   | 2 <sup>nd</sup> Season | 1 <sup>st</sup> Season | 2 <sup>nd</sup> Season | 1 <sup>st</sup> Season | 2 <sup>nd</sup> Season |
| Control (fresh water)           | 0.045d                                 | 0.040e                 | 69.06a                   | 65.11a                 | 2.67a                  | 2.56a                  | 0.65b                  | 0.70b                  |
| Sea water at 1000 ppm           | 0.178c                                 | 0.170d                 | 58.44 bc                 | 55.00 bc               | 1.67e                  | 1.73e                  | 0.41d                  | 0.47d                  |
| Sea water at 2000 ppm           | 0.266c                                 | 0.280cd                | 54.53 cd                 | 50.88 cd               | 2.40c                  | 2.29c                  | 0.50c                  | 0.52d                  |
| Sea water at 3000 ppm           | 0.502ab                                | 0.499ab                | 45.49e                   | 42.09e                 | 1.67e                  | 1.60f                  | 0.27e                  | 0.29e                  |
| 1000 ppm sea water + 20 mM GABA | 0.253c                                 | 0.249d                 | 59.77bc                  | 55.95 bc               | 2.17d                  | 2.06d                  | 0.56bc                 | 0.60c                  |
| 1000 ppm sea water + 40 mM GABA | 0.254c                                 | 0.250d                 | 60.95bc                  | 57.03 abc              | 2.43bc                 | 2.29c                  | 0.63b                  | 0.67b                  |
| 2000 ppm sea water + 20 mM GABA | 0.409b                                 | 0.400 bc               | 66.25ab                  | 62.57 ab               | 2.60ab                 | 2.50ab                 | 0.76a                  | 0.83a                  |
| 2000 ppm sea water + 40 mM GABA | 0.502ab                                | 0.507ab                | 64.88ab                  | 60.75 ab               | 2.57abc                | 2.48b                  | 0.81a                  | 0.85a                  |
| 3000 ppm sea water + 20 mM GABA | 0.550a                                 | 0.567a                 | 50.70de                  | 48.37 cde              | 1.30f                  | 1.25g                  | 0.23e                  | 0.26e                  |
| 2000 ppm sea water + 40 mM GABA | 0.589a                                 | 0.580a                 | 48.12de                  | 46.18 de               | 1.67e                  | 1.55f                  | 0.27e                  | 0.30e                  |

Means followed by the same letter at each column are not significantly different at the 5% level according to Duncan's multiple range test.

**Table S3. The effect of saline irrigation water and GABA application to peroxidase, catalase, and polyphenol activity of *Lavandula dentata* L. plants.**

| Treatments                      | Peroxidase activity    |                        | Catalase activity      |                        | Polyphenol activity    |                        |
|---------------------------------|------------------------|------------------------|------------------------|------------------------|------------------------|------------------------|
|                                 | 1 <sup>st</sup> Season | 2 <sup>nd</sup> Season | 1 <sup>st</sup> Season | 2 <sup>nd</sup> Season | 1 <sup>st</sup> Season | 2 <sup>nd</sup> Season |
| Control (fresh water)           | 0.101 e                | 0.111 g                | 125.80 h               | 123.9 i                | 0.103e                 | 0.101d                 |
| Sea water at 1000 ppm           | 0.116 d                | 0.125 f                | 251.00 g               | 244.6 h                | 0.106de                | 0.108cd                |
| Sea water at 2000 ppm           | 0.147 b                | 0.158 c                | 999.74 c               | 980.67 c               | 0.114c                 | 0.116b                 |
| Sea water at 3000 ppm           | 0.128 cd               | 0.139 e                | 935.25d                | 900.90d                | 0.111cd                | 0.110 bc               |
| 1000 ppm sea water + 20 mM GABA | 0.128 cd               | 0.136 e                | 399.90 f               | 380.7 g                | 0.104e                 | 0.104cd                |
| 1000 ppm sea water + 40 mM GABA | 0.141 bc               | 0.152 d                | 402.70 f               | 420.3f                 | 0.103e                 | 0.104cd                |
| 2000 ppm sea water + 20 mM GABA | 0.154 b                | 0.166 b                | 1585.10 a              | 1520 a                 | 0.132a                 | 0.129a                 |
| 2000 ppm sea water + 40 mM GABA | 0.168 a                | 0.175 a                | 1395.03 b              | 1400 b                 | 0.125b                 | 0.128a                 |
| 3000 ppm sea water + 20 mM GABA | 0.125 d                | 0.133 e                | 423.87e                | 421.43f                | 0.111cd                | 0.109bc                |
| 3000 ppm sea water + 40 mM GABA | 0.129 cd               | 0.136 e                | 426.45e                | 430.09e                | 0.106de                | 0.109bc                |

Means followed by the same letter at each column are not significantly different at the 5% level according to Duncan's multiple range test.
